# Supplementary material for: A novel quantitative read-across tool designed purposefully to fill the existing gaps in nanosafety data
Source: Royal Society of Chemistry journal article supplement (doi:10.1039/d1en00725d), 2021-11-25
Supplement: d1en00725d1.zip [file d1en00725d1.zip]

## Sheet: Biological Activity
	ID	Yeuc(Test)	Ygk(Test)	Ylk(Test)	Sigma value	No.of similar training compounds	Gamma value	Compounds(Euc)	Compounds(Gauss)	Compounds(Laplacian)	Dist.threshold	Sim.threshold
	17	2.87166	2.80516	2.75169	0.75	9	1	4	7	7	0.4	0.05
	5	2.11626	2.1045	2.12536				4	5	8
	6	2.2619	2.30102	2.33767				5	5	6
	10	2.3917	2.51519	2.45871				6	6	6
	8	2.28324	2.3664	2.41032				5	6	7
	11	2.48268	2.5232	2.5518				5	6	8
	12	2.52269	2.73095	2.60646				2	7	9
	7	2.25874	2.28815	2.33643				5	5	6
	9	2.3659	2.39241	2.42106				6	6	6
	Q2f1=	0.958565	0.86508	0.826738
	Q2f2=	0.957301	0.860964	0.821453
	RMSEP=	0.0473228	0.0853934	0.0967691
	Compounds	<2	signifies	only	one or zero	compounds	in the	Threshold	value

## Sheet: CLASSIFICATION
Serial No.	Z_ΔHfc [Kcal/mol]	Z_χc [eV]	pLC50
2	-0.140373	-1.27787	1.85
4	0.383073	-0.79501	2.05
14	0.647514	-0.569258	2.67
13	1.04996	-0.299609	2.64
16	0.904865	0.60967	2.87
15	-0.581817	1.23049	2.83
3	-0.230411	-0.330964	2.02
18	0.215523	1.7886	3.32
1	-2.24834	-0.356047	1.76
			2.44556
Serial No.	Z_ΔHfc [Kcal/mol]	Z_χc [eV]	pLC50	PREDICTION	RESIDUAL	SQUARED RESIDUAL
17	1.15442	0.81661	2.92	2.87166	0.048337	0.00233646	0.474444	0.225098	0.514444	0.264653
5	-0.18362	-1.04585	2.12	2.11626	0.00373706	1.39656e-05	-0.325556	0.105986	-0.285556	0.081542
6	0.9578	-1.33431	2.21	2.2619	-0.0518965	0.00269325	-0.235556	0.0554864	-0.195556	0.038242
10	1.43824	-0.631967	2.49	2.3917	0.0982964	0.00966219	0.0444444	0.00197531	0.0844444	0.00713086
8	0.721481	-0.700947	2.3	2.28324	0.0167644	0.000281045	-0.145556	0.0211864	-0.105556	0.011142
11	0.926606	-0.086399	2.5	2.48268	0.0173234	0.000300102	0.0544444	0.0029642	0.0944444	0.00891975
12	-0.413085	0.785255	2.56	2.52269	0.0373087	0.00139194	0.114444	0.0130975	0.154444	0.0238531
7	0.947875	-1.40329	2.24	2.25874	-0.018738	0.000351113	-0.205556	0.0422531	-0.165556	0.0274086
9	0.789069	-0.638238	2.31	2.3659	-0.0559013	0.00312496	-0.135556	0.0183753	-0.0955556	0.00913086
			2.40556			0.020155		0.486422		0.472022
						Q2F1	0.958565
	TP	3				Q2F2	0.957301
	TN	5				RMSEp	0.0473228
	FP	0
	FN	1
						85.7143
