# Supplementary material for: A novel quantitative read-across tool designed purposefully to fill the existing gaps in nanosafety data
Source: Royal Society of Chemistry journal article supplement (doi:10.1039/d1en00725d), 2021-11-25
Supplement: d1en00725d2.pdf [file d1en00725d2.pdf]

**Table S1** Dataset 1 containing metal oxides and their corresponding descriptor values, division set, and toxicity data.

| Serial No. | Metal oxide                    | $\Delta H^c_f$ | $\chi c$ | 1/Log LC <sub>50</sub> | Set      |
|------------|--------------------------------|----------------|----------|------------------------|----------|
| 1          | TiO <sub>2</sub>               | -1492          | 4.91     | 1.76                   | Training |
| 2          | Al <sub>2</sub> O <sub>3</sub> | -600           | 3.44     | 1.85                   | Training |
| 3          | ZrO <sub>2</sub>               | -638.1         | 4.95     | 2.02                   | Training |
| 4          | Fe <sub>2</sub> O <sub>3</sub> | -378.5         | 4.21     | 2.05                   | Training |
| 5          | SiO <sub>2</sub>               | -618.3         | 3.81     | 2.12                   | Test     |
| 6          | Y <sub>2</sub> O <sub>3</sub>  | -135.3         | 3.35     | 2.21                   | Test     |
| 7          | V <sub>2</sub> O <sub>3</sub>  | -139.5         | 3.24     | 2.24                   | Test     |
| 8          | Cr <sub>2</sub> O <sub>3</sub> | -235.3         | 4.36     | 2.3                    | Test     |
| 9          | Sb <sub>2</sub> O <sub>3</sub> | -206.7         | 4.46     | 2.31                   | Test     |
| 10         | NiO                            | 68             | 4.47     | 2.49                   | Test     |
| 11         | Bi <sub>2</sub> O <sub>3</sub> | -148.5         | 5.34     | 2.5                    | Test     |
| 12         | WO <sub>3</sub>                | -715.4         | 6.73     | 2.56                   | Test     |
| 13         | Mn <sub>2</sub> O <sub>3</sub> | -96.3          | 5        | 2.64                   | Training |
| 14         | SnO <sub>2</sub>               | -266.6         | 4.57     | 2.67                   | Training |
| 15         | CoO                            | -786.8         | 7.44     | 2.83                   | Training |
| 16         | La <sub>2</sub> O <sub>3</sub> | -157.7         | 6.45     | 2.87                   | Training |
| 17         | In <sub>2</sub> O <sub>3</sub> | -52.1          | 6.78     | 2.92                   | Test     |
| 18         | ZnO                            | -449.4         | 8.33     | 3.32                   | Training |

**Table 2S** Dataset 2 containing metal oxides and their corresponding descriptor values, division set, and toxicity data.

| Sl. No. | Metal oxide                    | $\Delta H_{Me^+}$ | $Me^+$ | 1/Log EC <sub>50</sub> | Division set |
|---------|--------------------------------|-------------------|--------|------------------------|--------------|
| 1       | TiO <sub>2</sub>               | 1575.73           | 4.0    | 1.74                   | Test         |
| 2       | SnO <sub>2</sub>               | 1717.32           | 4.0    | 2.01                   | Training     |
| 3       | ZrO <sub>2</sub>               | 1357.66           | 4.0    | 2.15                   | Test         |
| 4       | SiO <sub>2</sub>               | 1686.38           | 4.0    | 2.2                    | Test         |
| 5       | Fe <sub>2</sub> O <sub>3</sub> | 1408.29           | 3.0    | 2.29                   | Training     |
| 6       | Al <sub>2</sub> O <sub>3</sub> | 1187.83           | 3.0    | 2.49                   | Training     |
| 7       | Cr <sub>2</sub> O <sub>3</sub> | 1268.70           | 3.0    | 2.51                   | Test         |
| 8       | Sb <sub>2</sub> O <sub>3</sub> | 1233.06           | 3.0    | 2.64                   | Training     |
| 9       | In <sub>2</sub> O <sub>3</sub> | 1271.13           | 3.0    | 2.81                   | Training     |
| 10      | Bi <sub>2</sub> O <sub>3</sub> | 1137.40           | 3.0    | 2.82                   | Training     |
| 11      | La <sub>2</sub> O <sub>3</sub> | 1017.22           | 3.0    | 2.87                   | Test         |
| 12      | Y <sub>2</sub> O <sub>3</sub>  | 837.15            | 3.0    | 2.87                   | Test         |
| 13      | V <sub>2</sub> O <sub>3</sub>  | 1097.73           | 3.0    | 3.14                   | Training     |
| 14      | CuO                            | 706.25            | 2.0    | 3.2                    | Test         |
| 15      | NiO                            | 596.70            | 2.0    | 3.45                   | Test         |
| 16      | ZnO                            | 662.44            | 2.0    | 3.45                   | Test         |
| 17      | CoO                            | 601.80            | 2.0    | 3.51                   | Training     |

**Table 3S** Dataset 3 containing metal oxides and their corresponding descriptor values, division set, and toxicity data.

| Sl. Nos. | MeOx                           | <i>LZELEHHO</i> | $\Delta H_{Me+}$ | 1/Log EC <sub>50</sub> | Division Set |
|----------|--------------------------------|-----------------|------------------|------------------------|--------------|
| 1        | Al <sub>2</sub> O <sub>3</sub> | 0.21            | 1187.83          | 2.42                   | Test         |
| 2        | Bi <sub>2</sub> O <sub>3</sub> | 0.18            | 1137.40          | 3.55                   | Training     |
| 3        | Cr <sub>2</sub> O <sub>3</sub> | 0.20            | 1268.70          | 2.06                   | Training     |
| 4        | CuO                            | 0.18            | 706.25           | 4.24                   | Training     |
| 5        | Fe <sub>2</sub> O <sub>3</sub> | 0.17            | 1408.29          | 2.40                   | Test         |
| 6        | In <sub>2</sub> O <sub>3</sub> | 0.20            | 1271.13          | 2.83                   | Test         |
| 7        | La <sub>2</sub> O <sub>3</sub> | 0.12            | 1017.22          | 4.96                   | Training     |
| 8        | NiO                            | 0.18            | 596.70           | 3.79                   | Training     |
| 9        | Sb <sub>2</sub> O <sub>3</sub> | 0.17            | 1233.06          | 3.12                   | Training     |
| 10       | SiO <sub>2</sub>               | 0.24            | 1686.38          | 2.54                   | Test         |
| 11       | SnO <sub>2</sub>               | 0.22            | 1717.32          | 2.53                   | Test         |
| 12       | TiO <sub>2</sub>               | 0.19            | 1575.73          | 2.14                   | Training     |
| 13       | V <sub>2</sub> O <sub>3</sub>  | 0.17            | 1097.73          | 3.48                   | Test         |
| 14       | Y <sub>2</sub> O <sub>3</sub>  | 0.13            | 837.15           | 5.79                   | Test         |
| 15       | ZnO                            | 0.13            | 662.44           | 5.80                   | Training     |
| 16       | ZrO <sub>2</sub>               | 0.18            | 1357.66          | 2.58                   | Test         |

**Table S4** Computed metrics in different values of sigma (sigma optimization table)

| Sigma<br>value  | Dataset 1   |             |                   | Dataset 2   |             |                   | Dataset 3   |             |                   |
|-----------------|-------------|-------------|-------------------|-------------|-------------|-------------------|-------------|-------------|-------------------|
|                 | $Q^2_{F1}$  | $Q^2_{F2}$  | RMSE <sub>P</sub> | $Q^2_{F1}$  | $Q^2_{F2}$  | RMSE <sub>P</sub> | $Q^2_{F1}$  | $Q^2_{F2}$  | RMSE <sub>P</sub> |
| $\sigma = 0.25$ | 0.41        | 0.39        | 0.18              | 0.89        | 0.89        | 0.19              | 0.85        | 0.80        | 0.48              |
| $\sigma = 0.50$ | 0.71        | 0.70        | 0.12              | <b>0.91</b> | <b>0.91</b> | <b>0.17</b>       | 0.92        | 0.89        | 0.36              |
| $\sigma = 0.75$ | <b>0.87</b> | <b>0.86</b> | <b>0.08</b>       | 0.90        | 0.90        | 0.18              | <b>0.92</b> | <b>0.90</b> | <b>0.35</b>       |
| $\sigma = 1.00$ | 0.85        | 0.85        | 0.09              | 0.86        | 0.86        | 0.21              | 0.87        | 0.83        | 0.45              |
| $\sigma = 1.50$ | 0.65        | 0.64        | 0.14              | 0.64        | 0.64        | 0.34              | 0.70        | 0.59        | 0.69              |
| $\sigma = 2.00$ | 0.46        | 0.45        | 0.17              | 0.46        | 0.46        | 0.42              | 0.52        | 0.35        | 0.87              |

**Table S5** Computed metrics in different values of gamma (gamma optimization table)

| Gamma<br>value  | Dataset 1   |             |                   | Dataset 2   |             |                   | Dataset 3   |             |                   |
|-----------------|-------------|-------------|-------------------|-------------|-------------|-------------------|-------------|-------------|-------------------|
|                 | $Q^2_{F1}$  | $Q^2_{F2}$  | RMSE <sub>P</sub> | $Q^2_{F1}$  | $Q^2_{F2}$  | RMSE <sub>P</sub> | $Q^2_{F1}$  | $Q^2_{F2}$  | RMSE <sub>P</sub> |
| $\gamma = 0.25$ | 0.36        | 0.34        | 0.19              | 0.40        | 0.40        | 0.44              | 0.42        | 0.22        | 0.95              |
| $\gamma = 0.50$ | 0.60        | 0.59        | 0.15              | 0.67        | 0.67        | 0.33              | 0.67        | 0.56        | 0.72              |
| $\gamma = 0.75$ | 0.73        | 0.72        | 0.12              | 0.81        | 0.81        | 0.25              | 0.81        | 0.74        | 0.55              |
| $\gamma = 1.00$ | <b>0.79</b> | <b>0.79</b> | <b>0.11</b>       | 0.87        | 0.87        | 0.21              | 0.87        | 0.83        | 0.45              |
| $\gamma = 1.50$ | 0.79        | 0.79        | 0.11              | 0.90        | 0.90        | 0.18              | <b>0.91</b> | <b>0.88</b> | <b>0.38</b>       |
| $\gamma = 2.00$ | 0.73        | 0.72        | 0.12              | <b>0.91</b> | <b>0.91</b> | <b>0.17</b>       | 0.91        | 0.87        | 0.38              |

**Table S6** Optimization of the number of close training compound of Dataset 1

| No. of<br>C.T.C | Q <sup>2</sup> <sub>F1</sub> |             |             | Q <sup>2</sup> <sub>F2</sub> |             |             | RMSE <sub>p</sub> |             |             |
|-----------------|------------------------------|-------------|-------------|------------------------------|-------------|-------------|-------------------|-------------|-------------|
|                 | EUC                          | GK          | LK          | EUC                          | GK          | LK          | EUC               | GK          | LK          |
| 2               | 0.45                         | 0.48        | 0.59        | 0.44                         | 0.46        | 0.58        | 0.17              | 0.17        | 0.15        |
| 3               | 0.57                         | 0.58        | 0.47        | 0.56                         | 0.57        | 0.45        | 0.15              | 0.15        | 0.17        |
| 4               | 0.85                         | 0.80        | 0.80        | 0.84                         | 0.79        | 0.79        | 0.09              | 0.10        | 0.10        |
| 5               | <b>0.90</b>                  | <b>0.87</b> | <b>0.82</b> | <b>0.90</b>                  | <b>0.87</b> | <b>0.81</b> | <b>0.07</b>       | <b>0.08</b> | <b>0.10</b> |
| 6               | 0.78                         | 0.87        | 0.86        | 0.78                         | 0.86        | 0.85        | 0.11              | 0.08        | 0.09        |
| 7               | 0.73                         | 0.86        | 0.80        | 0.72                         | 0.85        | 0.80        | 0.12              | 0.09        | 0.10        |
| 8               | 0.63                         | 0.86        | 0.78        | 0.62                         | 0.86        | 0.77        | 0.14              | 0.09        | 0.11        |
| 9               | 0.63                         | 0.87        | 0.79        | 0.62                         | 0.86        | 0.79        | 0.14              | 0.08        | 0.11        |

C.T.C: close training compound; EUC: Euclidean distance similarity read-across; GK: Gaussian kernel function similarity read-across; LK: Laplacian kernel function similarity read-across.

**Table S7** Optimization of the number of close training compound of Dataset 2

| No. of<br>C.T.C | Q <sup>2</sup> <sub>F1</sub> |             |             | Q <sup>2</sup> <sub>F2</sub> |             |             | RMSE <sub>p</sub> |             |             |
|-----------------|------------------------------|-------------|-------------|------------------------------|-------------|-------------|-------------------|-------------|-------------|
|                 | EUC                          | GK          | LK          | EUC                          | GK          | LK          | EUC               | GK          | LK          |
| 2               | <b>0.91</b>                  | 0.89        | 0.90        | <b>0.91</b>                  | 0.89        | 0.90        | <b>0.17</b>       | 0.19        | 0.18        |
| 3               | 0.84                         | 0.91        | 0.92        | 0.84                         | 0.91        | 0.92        | 0.23              | 0.17        | 0.16        |
| 4               | 0.72                         | 0.91        | 0.91        | 0.72                         | 0.91        | 0.91        | 0.30              | 0.17        | 0.17        |
| 5               | 0.67                         | <b>0.92</b> | <b>0.92</b> | 0.67                         | <b>0.92</b> | <b>0.92</b> | 0.33              | <b>0.16</b> | <b>0.16</b> |
| 6               | 0.58                         | 0.91        | 0.91        | 0.58                         | 0.91        | 0.91        | 0.37              | 0.17        | 0.17        |
| 7               | 0.45                         | 0.91        | 0.91        | 0.45                         | 0.91        | 0.91        | 0.42              | 0.17        | 0.17        |
| 8               | 0.45                         | 0.91        | 0.91        | 0.45                         | 0.91        | 0.91        | 0.42              | 0.17        | 0.17        |

C.T.C: close training compound; EUC: Euclidean distance similarity read-across; GK: Gaussian kernel function similarity read-across; LK: Laplacian kernel function similarity read-across.

**Table S8** Optimization of the number of close training compound of Dataset 3

| No. of<br>C.T.C | Q2F1        |             |             | Q2F2        |             |             | RMSEP       |             |             |
|-----------------|-------------|-------------|-------------|-------------|-------------|-------------|-------------|-------------|-------------|
|                 | EUC         | GK          | LK          | EUC         | GK          | LK          | EUC         | GK          | LK          |
| 2               | 0.90        | 0.90        | 0.84        | 0.86        | 0.87        | 0.78        | 0.40        | 0.40        | 0.50        |
| 3               | <b>0.91</b> | 0.91        | 0.91        | <b>0.88</b> | 0.87        | 0.88        | <b>0.37</b> | 0.38        | 0.38        |
| 4               | 0.90        | <b>0.93</b> | <b>0.93</b> | 0.87        | <b>0.91</b> | <b>0.90</b> | 0.39        | <b>0.33</b> | <b>0.34</b> |
| 5               | 0.85        | 0.93        | 0.92        | 0.80        | 0.90        | 0.89        | 0.49        | 0.34        | 0.36        |
| 6               | 0.79        | 0.92        | 0.92        | 0.72        | 0.89        | 0.89        | 0.57        | 0.35        | 0.36        |
| 7               | 0.77        | 0.92        | 0.91        | 0.69        | 0.89        | 0.88        | 0.60        | 0.35        | 0.37        |
| 8               | 0.77        | 0.92        | 0.91        | 0.69        | 0.90        | 0.88        | 0.60        | 0.35        | 0.38        |

C.T.C: close training compound; EUC: Euclidean distance similarity read-across; GK: Gaussian kernel function similarity read-across; LK: Laplacian kernel function similarity read-across.

**Table S9** Optimization of the distance and similarity threshold of Dataset 1

| Threshold            | Q <sup>2</sup> <sub>F1</sub> |             |             | Q <sup>2</sup> <sub>F2</sub> |             |             | RMSE <sub>p</sub> |             |             |
|----------------------|------------------------------|-------------|-------------|------------------------------|-------------|-------------|-------------------|-------------|-------------|
|                      | EUC                          | GK          | LK          | EUC                          | GK          | LK          | EUC               | GK          | LK          |
| D=0.4, S=0.0         | 0.96                         | 0.87        | 0.79        | 0.96                         | 0.86        | 0.79        | 0.05              | 0.08        | 0.11        |
| <b>D=0.4, S=0.05</b> | <b>0.96</b>                  | <b>0.87</b> | <b>0.83</b> | <b>0.96</b>                  | <b>0.86</b> | <b>0.82</b> | <b>0.05</b>       | <b>0.09</b> | <b>0.10</b> |
| D=0.4, S=0.1         | 0.96                         | 0.85        | 0.82        | 0.96                         | 0.85        | 0.82        | 0.05              | 0.09        | 0.10        |
| D=0.5, S=0.0         | 0.71                         | 0.87        | 0.79        | 0.70                         | 0.86        | 0.79        | 0.13              | 0.08        | 0.11        |
| D=0.5, S=0.05        | 0.71                         | 0.87        | 0.83        | 0.70                         | 0.86        | 0.82        | 0.13              | 0.09        | 0.10        |
| D=0.5, S=0.1         | 0.71                         | 0.85        | 0.82        | 0.70                         | 0.85        | 0.82        | 0.13              | 0.09        | 0.10        |
| D=0.6, S=0.0         | 0.71                         | 0.87        | 0.79        | 0.70                         | 0.86        | 0.79        | 0.13              | 0.08        | 0.11        |
| D=0.6, S=0.05        | 0.71                         | 0.87        | 0.83        | 0.70                         | 0.86        | 0.82        | 0.13              | 0.09        | 0.10        |
| D=0.6, S=0.1         | 0.71                         | 0.85        | 0.82        | 0.70                         | 0.85        | 0.82        | 0.13              | 0.09        | 0.10        |

**D**: distance threshold; **S**: similarity threshold; **EUC**: Euclidean distance similarity read-across; **GK**: Gaussian kernel function similarity read-across; **LK**: Laplacian kernel function similarity read-across.

**Table S10** Optimization of the distance and similarity threshold of Dataset 2

| Threshold         | Q <sup>2</sup> <sub>F1</sub> |             |             | Q <sup>2</sup> <sub>F2</sub> |             |             | RMSE <sub>p</sub> |             |             |
|-------------------|------------------------------|-------------|-------------|------------------------------|-------------|-------------|-------------------|-------------|-------------|
|                   | EUC                          | GK          | LK          | EUC                          | GK          | LK          | EUC               | GK          | LK          |
| <b>D=0.5, S=0</b> | <b>0.59</b>                  | <b>0.91</b> | <b>0.91</b> | <b>0.59</b>                  | <b>0.91</b> | <b>0.91</b> | <b>0.37</b>       | <b>0.17</b> | <b>0.17</b> |
| D=0.6, S=0        | 0.47                         | 0.91        | 0.91        | 0.47                         | 0.91        | 0.91        | 0.42              | 0.17        | 0.17        |
| D=0.7, S=0        | 0.45                         | 0.91        | 0.91        | 0.45                         | 0.91        | 0.91        | 0.43              | 0.17        | 0.17        |
| D=0.8, S=0        | 0.45                         | 0.91        | 0.91        | 0.45                         | 0.91        | 0.91        | 0.42              | 0.17        | 0.17        |
| D=0.9, S=0        | 0.45                         | 0.91        | 0.91        | 0.45                         | 0.91        | 0.91        | 0.42              | 0.17        | 0.17        |
| D=1, S=0          | 0.45                         | 0.91        | 0.91        | 0.45                         | 0.91        | 0.91        | 0.42              | 0.17        | 0.17        |

**D**: distance threshold; **S**: similarity threshold; **EUC**: Euclidean distance similarity read-across; **GK**: Gaussian kernel function similarity read-across; **LK**: Laplacian kernel function similarity read-across.

**Table S11** Optimization of the distance and similarity threshold of Dataset 3

| Threshold           | Q <sup>2</sup> <sub>F1</sub> |             |             | Q <sup>2</sup> <sub>F2</sub> |             |             | RMSE <sub>p</sub> |             |             |
|---------------------|------------------------------|-------------|-------------|------------------------------|-------------|-------------|-------------------|-------------|-------------|
|                     | EUC                          | GK          | LK          | EUC                          | GK          | LK          | EUC               | GK          | LK          |
| <b>D=0.4, S=0.0</b> | <b>0.96</b>                  | <b>0.92</b> | <b>0.91</b> | <b>0.95</b>                  | <b>0.90</b> | <b>0.88</b> | <b>0.23</b>       | <b>0.35</b> | <b>0.38</b> |
| D=0.4, S=0.1        | 0.96                         | 0.92        | 0.90        | 0.95                         | 0.89        | 0.86        | 0.23              | 0.35        | 0.40        |
| D=0.5, S=0.0        | 0.95                         | 0.92        | 0.91        | 0.93                         | 0.90        | 0.88        | 0.28              | 0.35        | 0.38        |
| D=0.5, S=0.1        | 0.95                         | 0.92        | 0.90        | 0.93                         | 0.89        | 0.86        | 0.28              | 0.35        | 0.40        |
| D=0.6, S=0.0        | 0.83                         | 0.92        | 0.91        | 0.77                         | 0.90        | 0.88        | 0.51              | 0.35        | 0.38        |
| D=0.6, S=0.1        | 0.83                         | 0.92        | 0.90        | 0.77                         | 0.89        | 0.86        | 0.51              | 0.35        | 0.40        |
| D=0.7, S=0.0        | 0.82                         | 0.92        | 0.91        | 0.76                         | 0.90        | 0.88        | 0.53              | 0.35        | 0.38        |
| D=0.7, S=0.1        | 0.82                         | 0.92        | 0.90        | 0.76                         | 0.89        | 0.86        | 0.53              | 0.35        | 0.40        |

**D**: distance threshold; **S**: similarity threshold; **EUC**: Euclidean distance similarity read-across; **GK**: Gaussian kernel function similarity read-across; **LK**: Laplacian kernel function similarity read-across.
